# Supplementary material
Source: PubMed Central journal article supplement (PMC2731637)
Supplement: blood-2009-02-206193_1.pdf [file blood-2009-02-206193_1.pdf]

## Clade A - B42

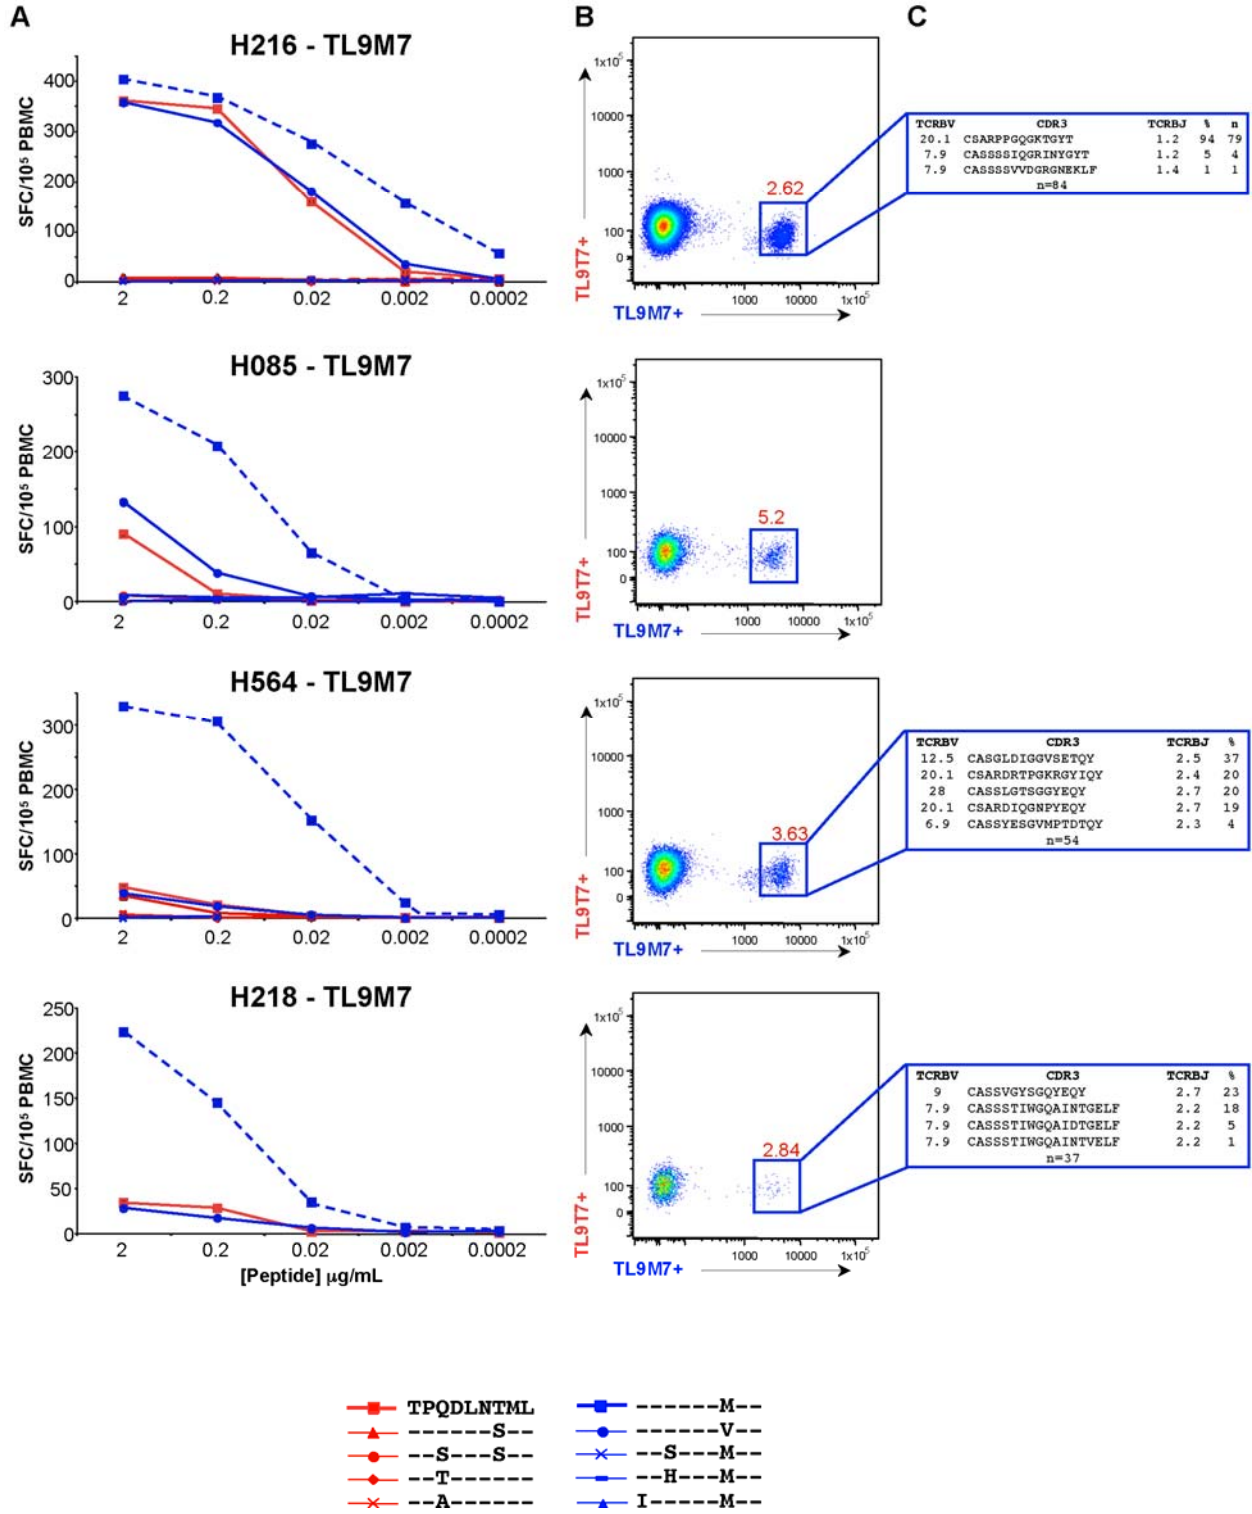

## Clade C - B42

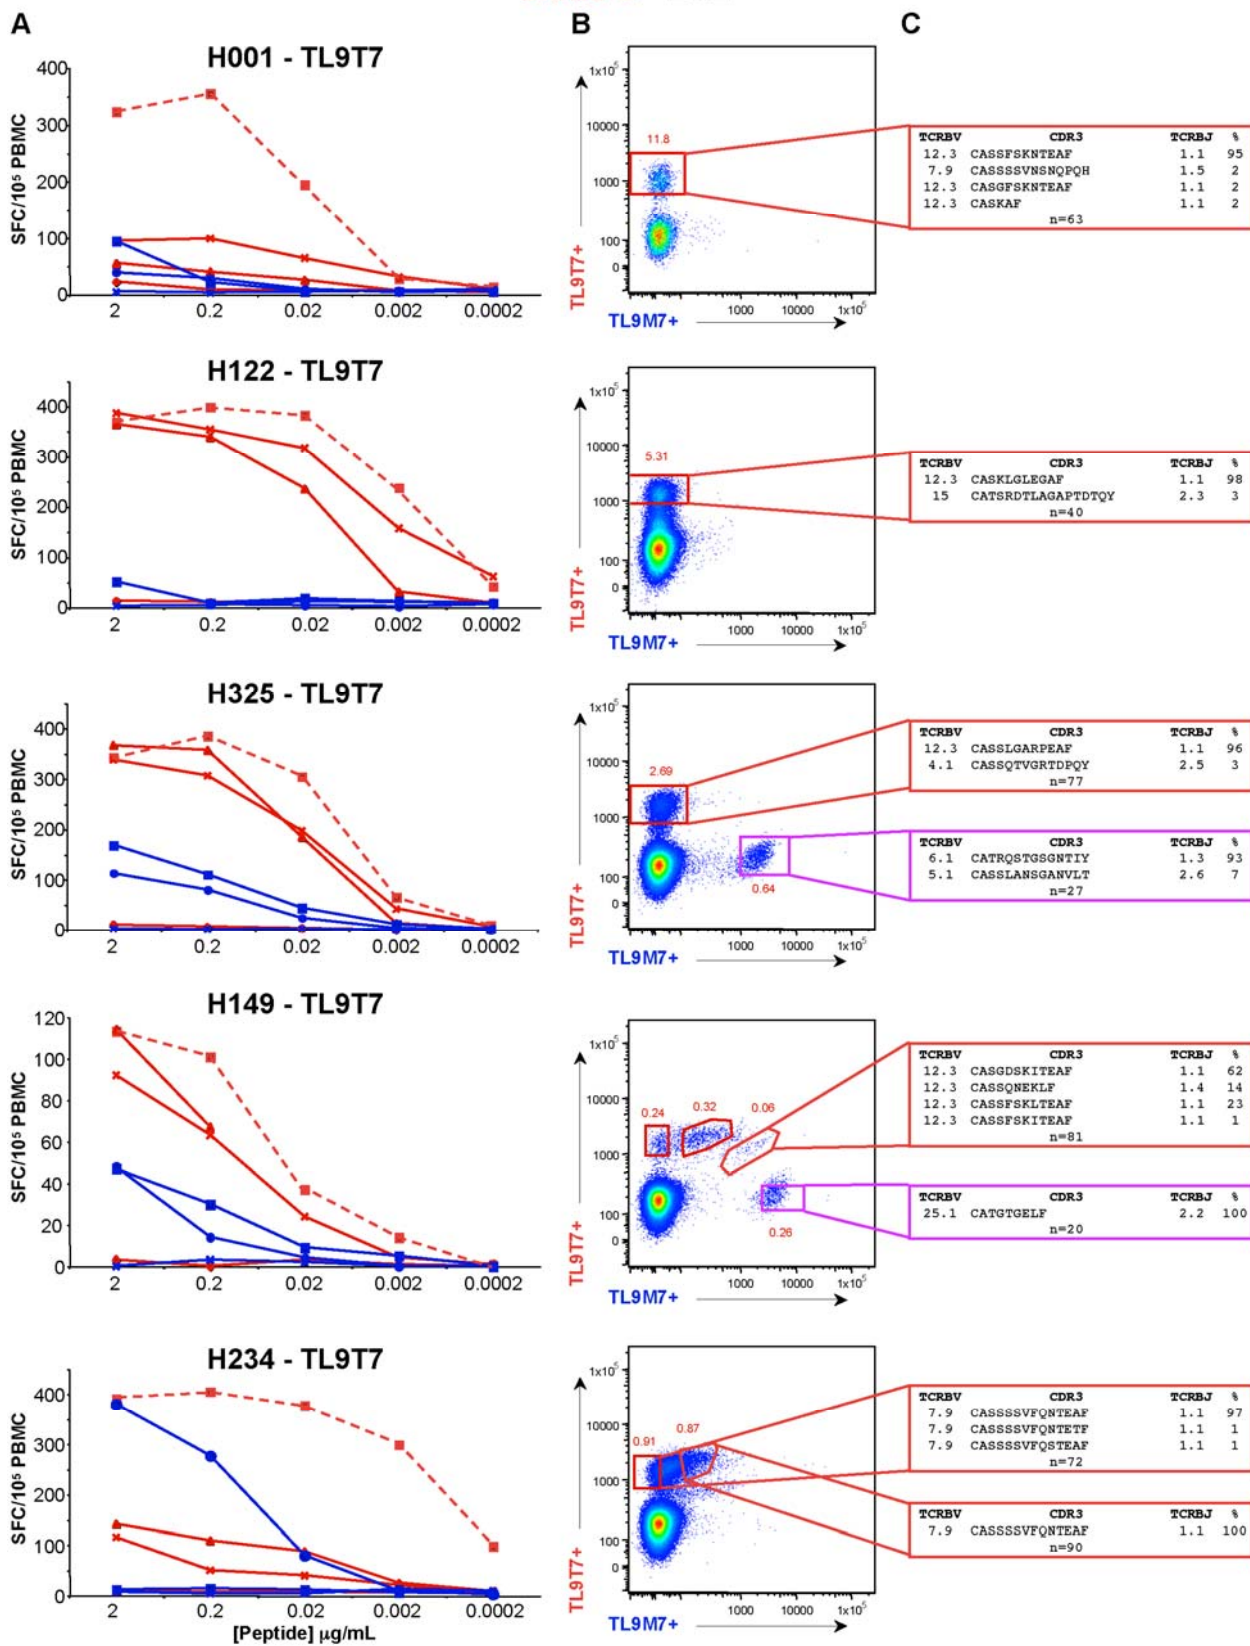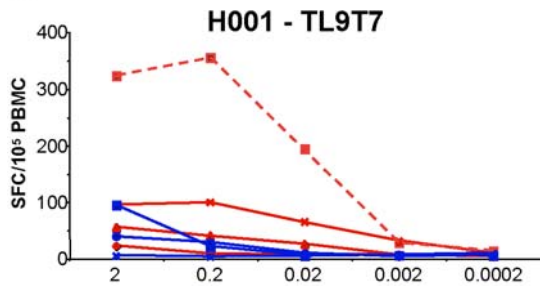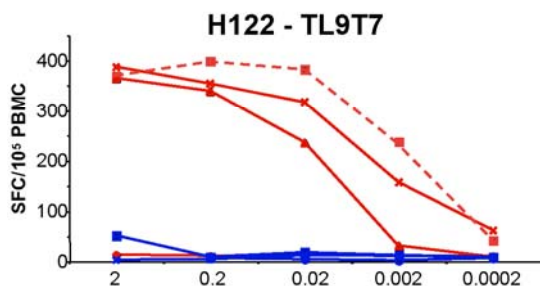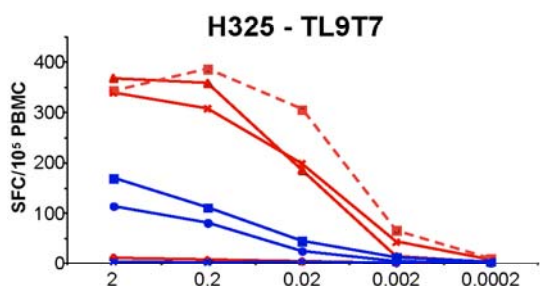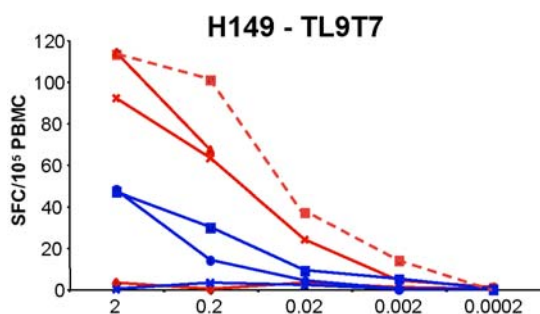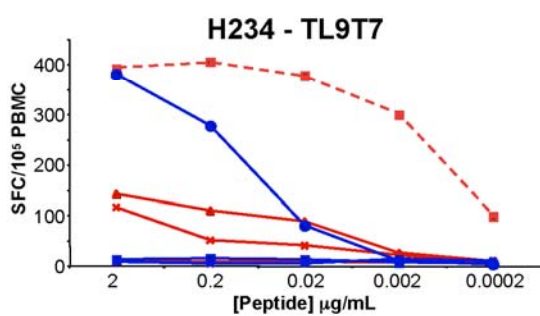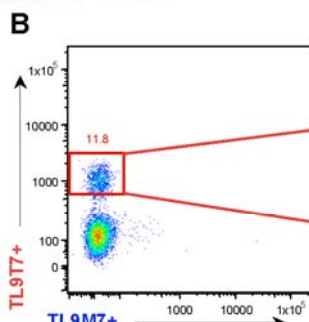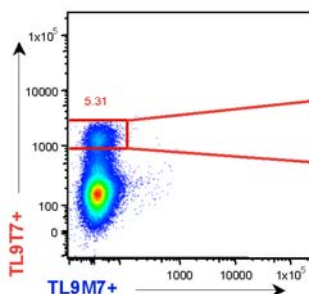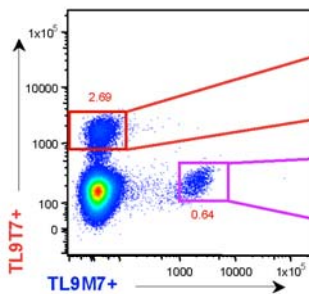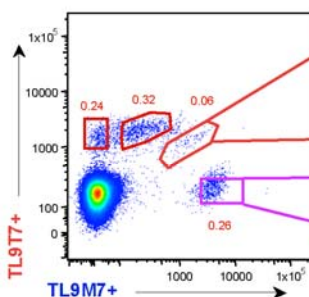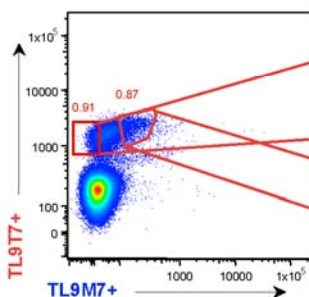

## Clade A - B81

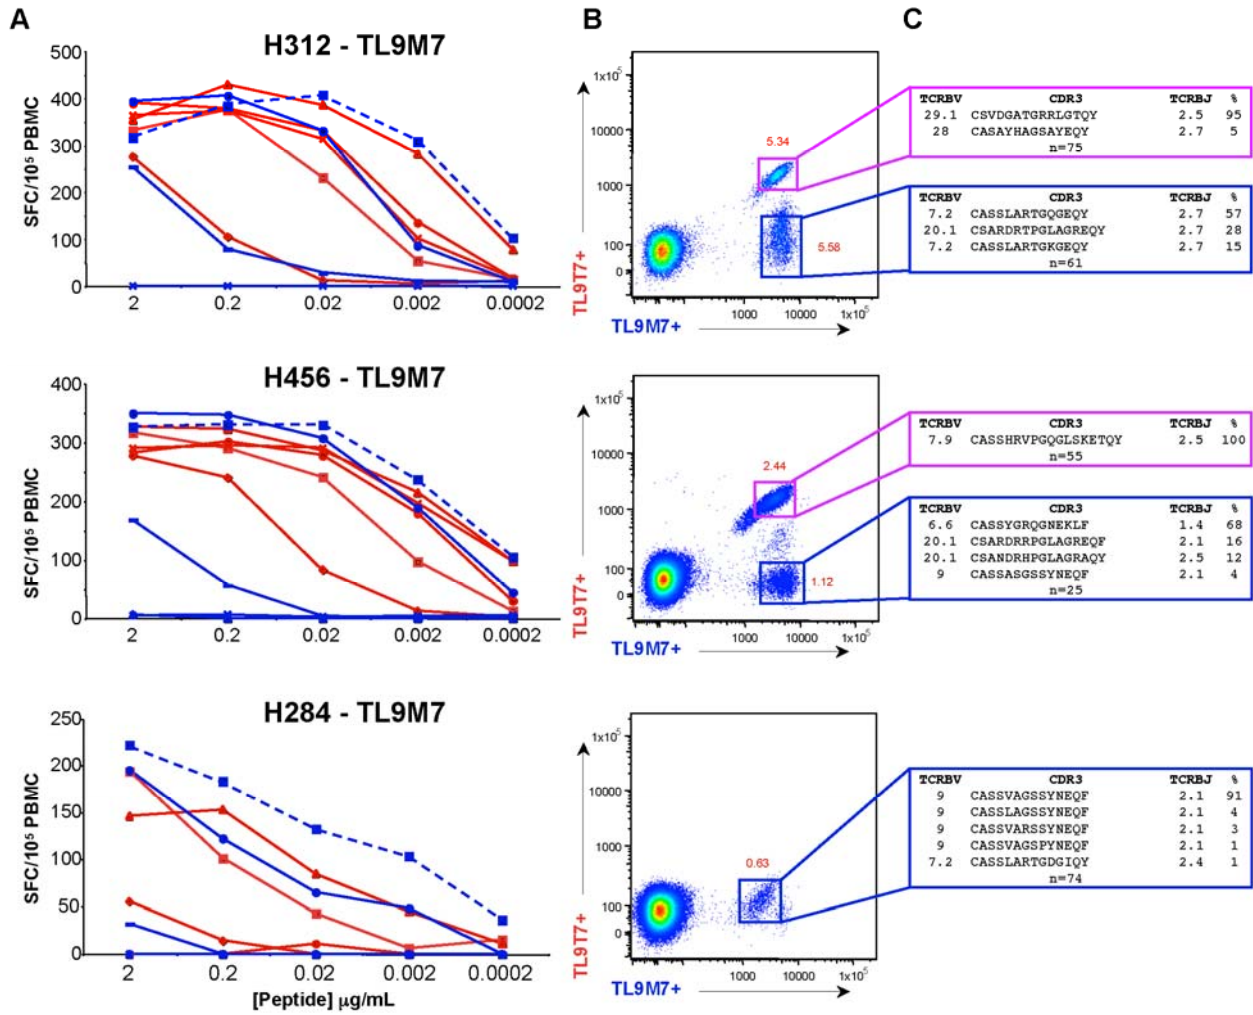

## Clade C - B81

**A**

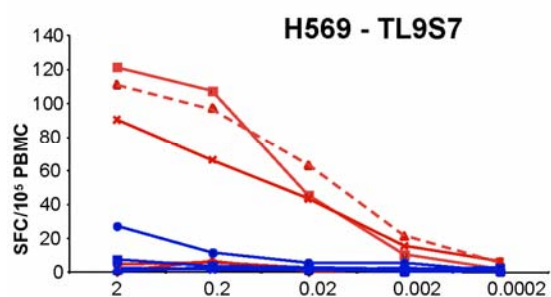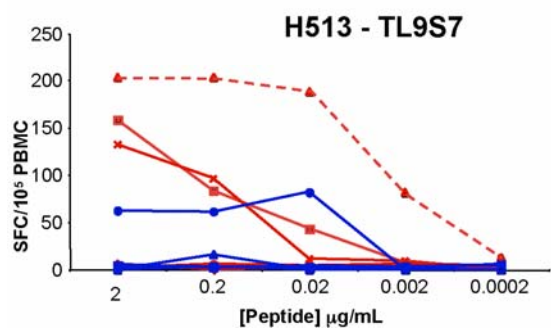

**B**

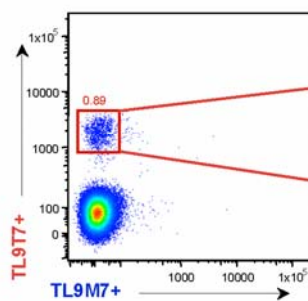

**C**

| TCRBV | CDR3        | TCRBJ | %  |
|-------|-------------|-------|----|
| 12.3  | CASLGLSLEQY | 2.7   | 50 |
| 12.3  | CASLGLYTEAF | 1.1   | 41 |
| 12.3  | CASLGLNTIY  | 1.3   | 7  |
| 12.3  | CASLGGLEKLF | 1.4   | 2  |
| n=56  |             |       |    |

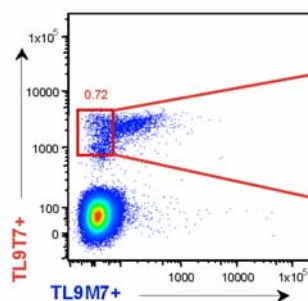

| TCRBV | CDR3         | TCRBJ | %  |
|-------|--------------|-------|----|
| 12.3  | CASRRGPHEQY  | 2.7   | 76 |
| 12.3  | CASRRGGFYEQY | 2.7   | 5  |
| 12.3  | CASLGLSLEQY  | 2.7   | 5  |
| 12.3  | CASLGLVNRH   | 1.5   | 5  |
| 12.3  | CASLYTEAF    | 1.1   | 3  |
| 12.3  | CASLGLNTIY   | 1.3   | 3  |
| n=37  |              |       |    |
